# Supplementary material for: Towards near-real time air pollutant and greenhouse gas emissions: lessons learned from multiple estimates during the COVID-19 Pandemic
Source: Copernicus journal article supplement (doi:10.5194/egusphere-2023-186), 2023-02-28
Supplement: Supplementary file 1 [file egusphere-2023-186-supplement.pdf]

# Supplementary material

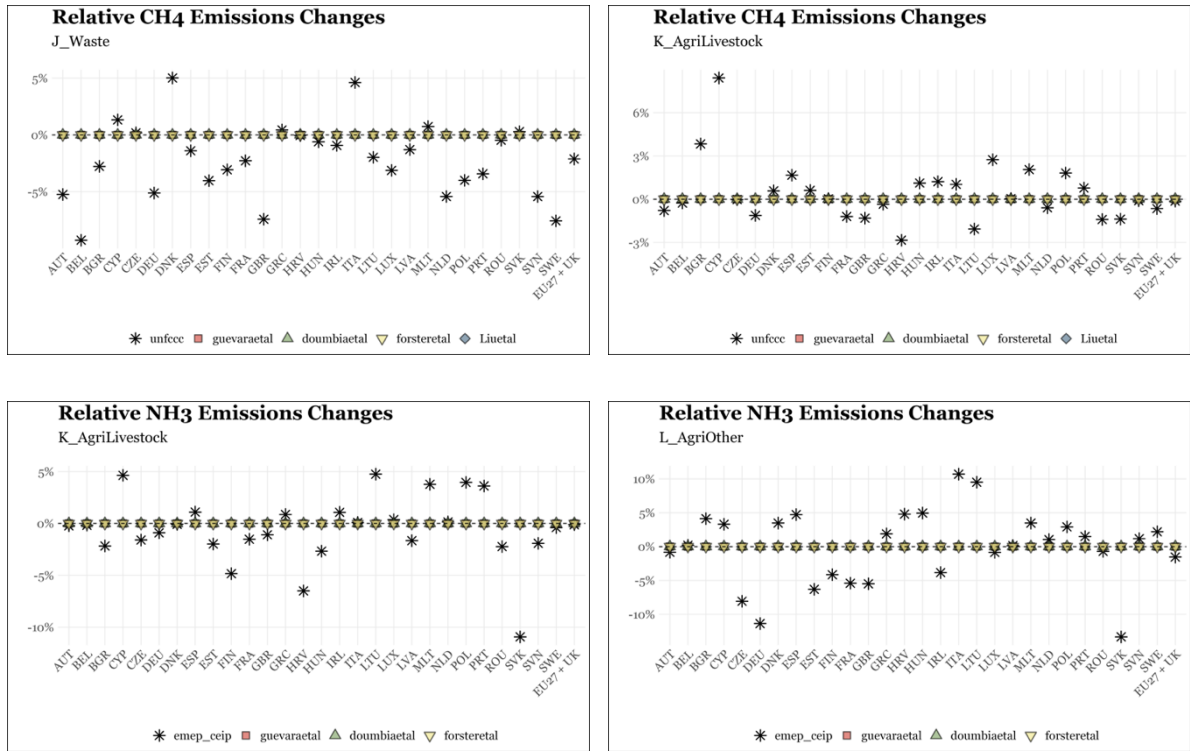

Figure S1: Relative emission changes [%] reported by official (emep\_ceip, unfccc) and non-official datasets (guevaraetal, forsteretal, doumbiaetal) per country and at the EU27+UK level for the waste management (GNFR\_J) (a) livestock (GNFR\_K) (b, c) and other agricultural emissions (GNFR\_L) (d)
